# Supplementary material for: Formation of secondary Moiré patterns for characterization of nanoporous alumina structures in multiple domains with different orientations
Source: Royal Society of Chemistry journal article supplement (doi:10.1039/c3nr34042b), 2013-01-01
Supplement: c3nr34042b.pdf [file c3nr34042b.pdf]

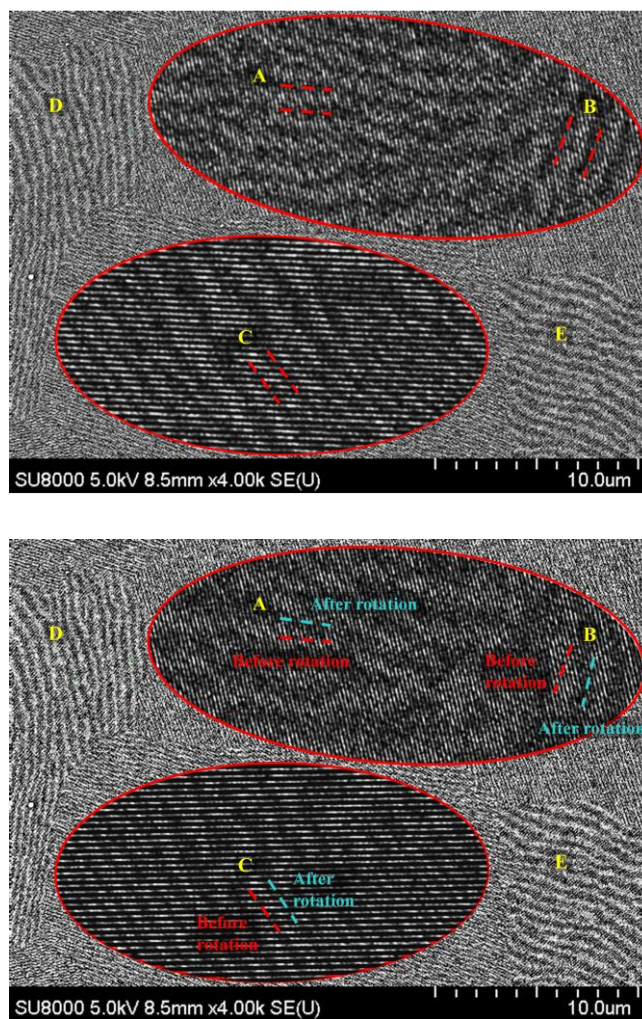

Figure S Rotation directions of the secondary Moiré fringes on the alumina nanoporous structure when the digital gratings are anticlockwise rotated, (a) before rotation and (b) after rotation.

The secondary Moiré fringes rotate clockwise in region A, anticlockwise in region B and clockwise in region C
